# Supplementary material for: Fidelity quantification of mercury(ii) ion via circumventing biothiols-induced sequestration in enzymatic amplification system
Source: Royal Society of Chemistry journal article supplement (doi:10.1039/c6ra16960k), 2016-01-01
Supplement: c6ra16960k1.pdf [file c6ra16960k1.pdf]

## **Electronic Supplementary Information (ESI)**

### **Fidelity quantification of mercury(II) ion via circumventing biothiols-induced sequestration in enzymatic amplification system**

**Yue Zhao, Huaqing Liu, Feng Chen, Min Bai and Yongxi Zhao\***

The Key Laboratory of Biomedical Information Engineering of Ministry of Education, School of Life Science and Technology, Xi'an Jiaotong University, Xi'an, Shaanxi 710049, P. R. China

\* To whom correspondence should be addressed.

E-mail: [yxzhao@mail.xjtu.edu.cn](mailto:yxzhao@mail.xjtu.edu.cn) (Y.X. Zhao).

The authors declare no competing financial interest.

## Results and Discussion

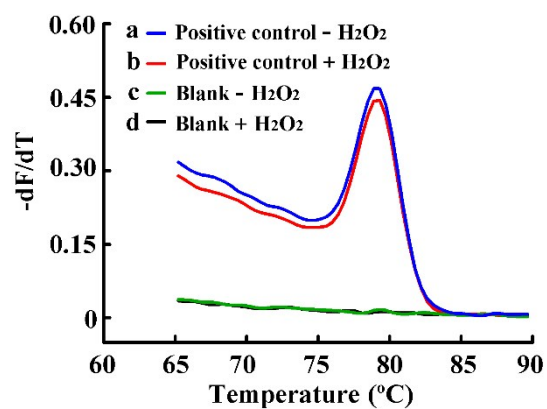

**Fig. S1.** The melting curve analysis of polymerase reaction in the presence of 20 nM complementary primer (positive control) before (a) and after (b) the addition of H<sub>2</sub>O<sub>2</sub> (0.01%), with corresponding blank controls without primer (c, d), respectively.

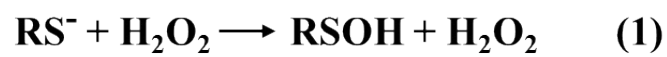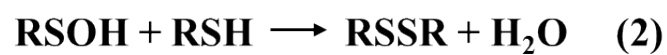

**Fig. S2.** The mechanism of the redox reaction between  $\text{H}_2\text{O}_2$  and biothiol.  $\text{H}_2\text{O}_2$  reacts with biothiol to produce sulfenic acid (Reaction 1) initially, and reaction with excess biothiol to give the disulfide (Reaction 2) immediately occurs next.

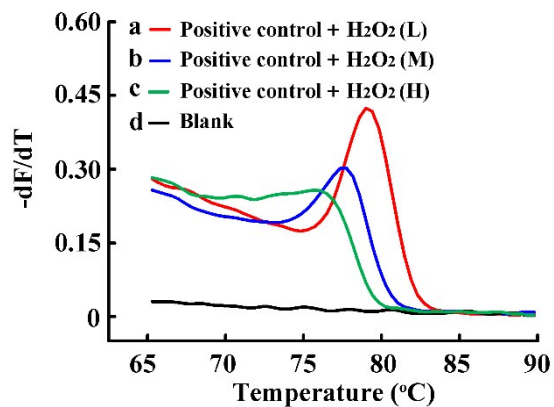

**Fig. S3.** The melting curve analysis of polymerase reaction in the presence 20 nM complementary primer (positive control) after the addition of H<sub>2</sub>O<sub>2</sub> with low (0.01%, a), medium (1%, b) and high (2%, c) concentration, with corresponding blank controls without primer (d), respectively. The bracketed capital letters represent the low, medium and high concentration of H<sub>2</sub>O<sub>2</sub>, respectively.

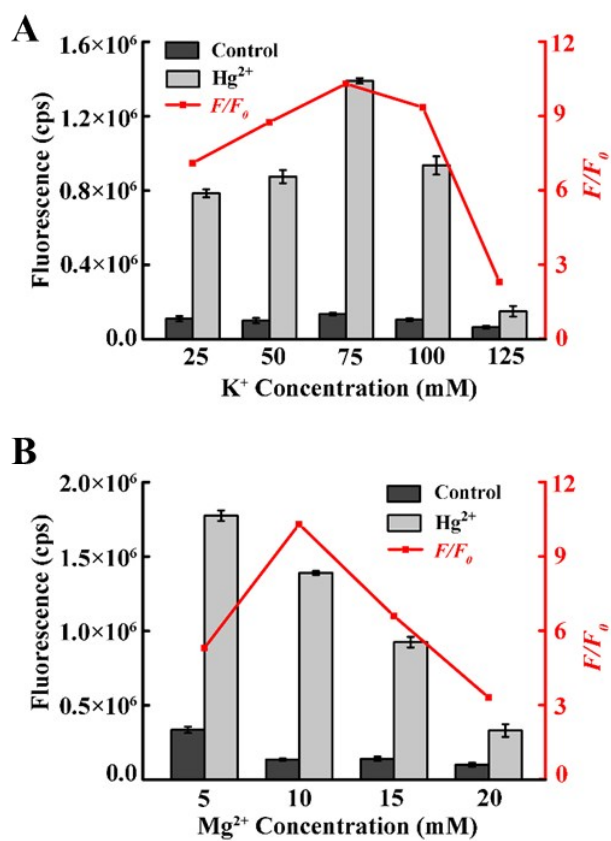

**Figure S4.** The effect of potassium ion (A), magnesium ion (B) concentration on the fluorescence response of the sensing system, respectively.

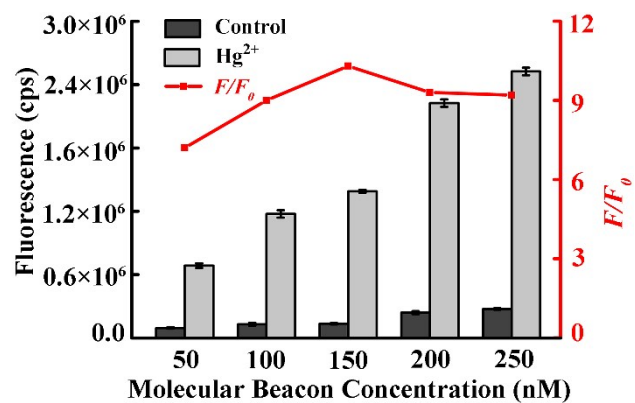

**Figure S5.** The effect of molecular beacon concentration on the fluorescence response of the sensing system.

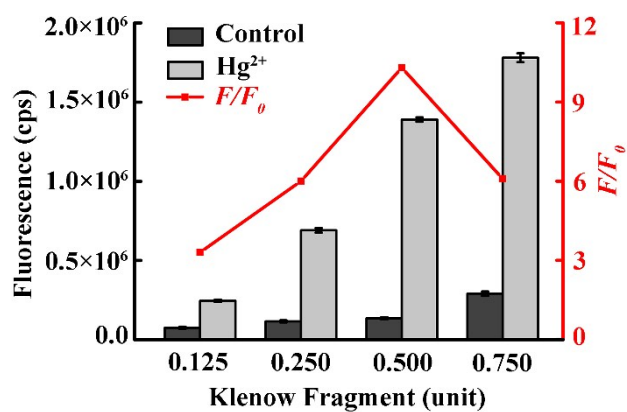

**Figure S6.** The effect of Klenow Fragment concentration on the fluorescence response of the sensing system.

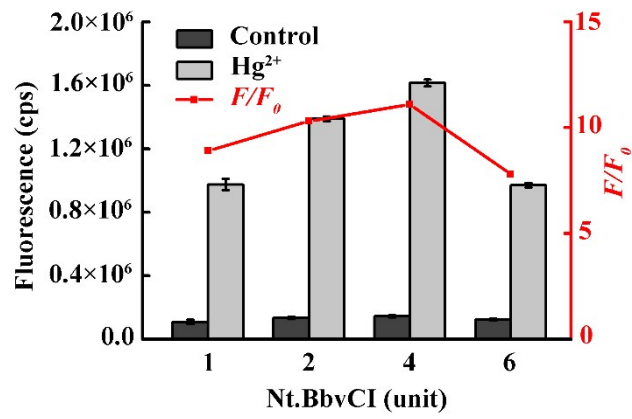

**Figure S7.** The effect of Nt.BbvCI concentration on the fluorescence response of the sensing system.
